# Supplementary material for: Molecular Typing and Antimicrobial Susceptibility Profiles of Streptococcus uberis Isolated from Sheep Milk
Source: MDPI journal article supplement (doi:10.3390/pathogens10111489), 2021-11-16
Supplement: s1 [file s1]

**Supplementary Table S1.**

*Streptococcus uberis* isolates from ovine milk included in this study. Isolates were grouped by ST, corresponding to the combination of seven genes (*arcC*, *ddl*, *gki*, *recP*, *tdk*, *tpi*, and *yqiL*). Clonal complexes (CC) are also reported for some isolates. The new alleles and ST are indicated with an asterisk.

| N Isolate    | ST    | <i>arcC</i> | <i>ddl</i> | <i>gki</i> | <i>recP</i> | <i>tdk</i> | <i>tpi</i> | <i>yqiL</i> | CC  |
|--------------|-------|-------------|------------|------------|-------------|------------|------------|-------------|-----|
| <i>n</i> = 1 | 294   | 10          | 1          | 5          | 2           | 45         | 4          | 3           | 143 |
| <i>n</i> = 1 | 350   | 3           | 2          | 3          | 3           | 3          | 2          | 3           | 86  |
| <i>n</i> = 1 | 384   | 4           | 1          | 5          | 2           | 17         | 4          | 10          | 143 |
| <i>n</i> = 1 | 386   | 1           | 2          | 3          | 2           | 1          | 1          | 35          |     |
| <i>n</i> = 3 | 562   | 5           | 1          | 4          | 2           | 4          | 4          | 3           | 143 |
| <i>n</i> = 4 | 808   | 3           | 1          | 3          | 2           | 3          | 4          | 3           | 143 |
| <i>n</i> = 1 | 868   | 3           | 1          | 3          | 2           | 3          | 2          | 3           |     |
| <i>n</i> = 1 | 910   | 3           | 58         | 41         | 2           | 3          | 4          | 3           |     |
| <i>n</i> = 1 | 1112  | 16          | 1          | 4          | 2           | 33         | 4          | 3           | 143 |
| <i>n</i> = 2 | 1265  | 3           | 41         | 4          | 2           | 3          | 1          | 10          |     |
| <i>n</i> = 1 | 1266  | 4           | 1          | 11         | 2           | 46         | 33         | 30          |     |
| <i>n</i> = 1 | 1267  | 4           | 1          | 11         | 2           | 46         | 33         | 3           |     |
| <i>n</i> = 1 | 1268  | 3           | 2          | 5          | 3           | 9          | 2          | 3           |     |
| <i>n</i> = 1 | 1167* | 4           | 1          | 34         | 2           | 29         | 4          | 15          |     |
| <i>n</i> = 1 | 1168* | 10          | 1          | 5          | 1           | 46         | 4          | 15          |     |
| <i>n</i> = 1 | 1169* | 17          | 7          | 34         | 2           | 29         | 4          | 15          |     |
| <i>n</i> = 1 | 1170* | 3           | 2          | 3          | 2           | 3          | 4          | 9           |     |
| <i>n</i> = 1 | 1171* | 4           | 2          | 34         | 2           | 51         | 4          | 30          |     |
| <i>n</i> = 1 | 1172* | 10          | 2          | 34         | 1           | 47         | 33         | 15          |     |
| <i>n</i> = 2 | 1173* | 25          | 1          | 4          | 3           | 17         | 1          | 10          |     |
| <i>n</i> =3  | 1174* | 9           | 1          | 4          | 3           | 2          | 1          | 10          |     |
| <i>n</i> = 2 | 1175* | 3           | 2          | 5          | 3           | 3          | 2          | 3           | 86  |
| <i>n</i> = 3 | 1176* | 4           | 1          | 5          | 2           | 44         | 4          | 5           |     |
| <i>n</i> = 4 | 1177* | 4           | 1          | 5          | 2           | 44         | 4          | 10          |     |
| <i>n</i> = 1 | 1178* | 10          | 1          | 5          | 2           | 45         | 4          | 5           |     |
| <i>n</i> = 1 | 1179* | 9           | 1          | 4          | 3           | 17         | 1          | 10          |     |
| <i>n</i> = 1 | 1180* | 2           | 2          | 29         | 2           | 29         | 4          | 15          |     |
| <i>n</i> = 1 | 1181* | 3           | 1          | 3          | 4           | 3          | 4          | 3           |     |
| <i>n</i> = 3 | 1182* | 4           | 42         | 11         | 2           | 46         | 33         | 30          |     |
| <i>n</i> = 1 | 1183* | 42          | 2          | 32         | 2           | 47         | 33         | 38          |     |
| <i>n</i> = 1 | 1184* | 4           | 1          | 5          | 2           | 44         | 4          | 15          |     |
| <i>n</i> = 1 | 1185* | 3           | 2          | 5          | 3           | 34         | 4          | 3           | 86  |
| <i>n</i> = 2 | 1186* | 4           | 1          | 5          | 2           | 44         | 4          | 38          |     |
| <i>n</i> = 1 | 1187* | 4           | 1          | 9          | 3           | 42         | 4          | 5           |     |
| <i>n</i> = 3 | 1188* | 4           | 2          | 5          | 4           | 9          | 1          | 3           |     |
| <i>n</i> = 2 | 1189* | 10          | 1          | 5          | 2           | 46         | 4          | 3           | 143 |
| <i>n</i> = 1 | 1190* | 3           | 58         | 41         | 2           | 3          | 2          | 3           |     |
| N Isolate    | ST    | <i>arcC</i> | <i>ddl</i> | <i>gki</i> | <i>recP</i> | <i>tdk</i> | <i>tpi</i> | <i>yqiL</i> | CC  |

|              |       |     |     |     |     |      |     |     |     |
|--------------|-------|-----|-----|-----|-----|------|-----|-----|-----|
| <i>n</i> = 1 | 1191* | 35  | 24  | 3   | 2   | 3    | 1   | 3   | 143 |
| <i>n</i> = 4 | 1192* | 4   | 1   | 5   | 2   | 44   | 4   | 3   |     |
| <i>n</i> = 1 | 1193* | 9   | 1   | 4   | 3   | 44   | 1   | 10  |     |
| <i>n</i> = 1 | 1194* | 10  | 2   | 4   | 2   | 47   | 33  | 38  | 143 |
| <i>n</i> = 1 | 1195* | 5   | 1   | 4   | 2   | 33   | 4   | 3   |     |
| <i>n</i> = 2 | 1196* | 3   | 1   | 4   | 2   | 3    | 2   | 3   |     |
| <i>n</i> = 1 | 1197* | 1   | 61  | 4   | 1   | 2    | 1   | 36  | 5   |
| <i>n</i> = 1 | 1198* | 3   | 1   | 3   | 1   | 9    | 4   | 3   |     |
| <i>n</i> = 1 | 1199* | 3   | 1   | 5   | 2   | 3    | 2   | 3   |     |
| <i>n</i> = 1 | 1200* | 3   | 2   | 3   | 2   | 31   | 4   | 3   | 86  |
| <i>n</i> = 1 | 1231* | 81* | 68* | 4   | 36* | 46   | 43* | 15  |     |
| <i>n</i> = 2 | 1232* | 3   | 65* | 3   | 4   | 5    | 2   | 3   |     |
| <i>n</i> = 1 | 1233* | 10  | 1   | 5   | 1   | 46   | 4   | 75* | 76* |
| <i>n</i> = 1 | 1234* | 84* | 10  | 66* | 2   | 111* | 45* | 76* |     |
| <i>n</i> = 1 | 1235* | 10  | 67* | 4   | 2   | 46   | 33  | 10  |     |
| <i>n</i> = 2 | 1236* | 4   | 4   | 3   | 1   | 44   | 4   | 77* | 30  |
| <i>n</i> = 2 | 1237* | 10  | 1   | 5   | 2   | 45   | 43* | 30  |     |
| <i>n</i> = 1 | 1238* | 7   | 1   | 67* | 2   | 73   | 4   | 5   |     |
| <i>n</i> = 1 | 1239* | 10  | 67* | 5   | 2   | 45   | 4   | 10  | 30  |
| <i>n</i> = 2 | 1240* | 10  | 68* | 5   | 2   | 45   | 43* | 30  |     |
| <i>n</i> = 1 | 1241* | 40  | 1   | 68* | 2   | 17   | 4   | 78* |     |
| <i>n</i> = 3 | 1242* | 80* | 1   | 4   | 1   | 13   | 1   | 3   | 10  |
| <i>n</i> = 1 | 1243* | 5   | 1   | 70  | 1   | 13   | 1   | 10  |     |
| <i>n</i> = 2 | 1244* | 3   | 2   | 3   | 2   | 110* | 2   | 3   |     |
| <i>n</i> = 1 | 1245* | 21  | 4   | 63  | 2   | 10   | 43* | 15  | 38  |
| <i>n</i> = 1 | 1246* | 81* | 10  | 3   | 2   | 112* | 7   | 38  |     |
| <i>n</i> = 4 | 1247* | 42  | 10  | 70* | 2   | 111  | 4   | 27  |     |
| <i>n</i> = 1 | 1248* | 21  | 2   | 63  | 2   | 6    | 43* | 15  | 81* |
| <i>n</i> = 1 | 1249* | 4   | 1   | 16  | 1   | 13   | 4   | 81* |     |
| <i>n</i> = 1 | 1250* | 82* | 1   | 5   | 2   | 45   | 4   | 38  |     |
| <i>n</i> = 2 | 1251* | 42  | 67* | 4   | 2   | 46   | 33  | 30  | 5   |
| <i>n</i> = 1 | 1252* | 3   | 1   | 5   | 2   | 112* | 7   | 5   |     |
| <i>n</i> = 1 | 1253* | 10  | 67* | 4   | 1   | 46   | 4   | 33  |     |
| <i>n</i> = 1 | 1254* | 42  | 10  | 70* | 2   | 29   | 4   | 27  | 38  |
| <i>n</i> = 2 | 1255* | 4   | 67* | 32  | 2   | 46   | 4   | 38  |     |
| <i>n</i> = 2 | 1256* | 81* | 10  | 3   | 2   | 115* | 4   | 15  |     |
| <i>n</i> = 1 | 1257* | 3   | 1   | 5   | 2   | 112* | 7   | 62  | 27  |
| <i>n</i> = 1 | 1258* | 83* | 10  | 70* | 2   | 111* | 4   | 27  |     |
| <i>n</i> = 1 | 1259* | 10  | 68* | 6   | 2   | 45   | 43* | 30  |     |
| <i>n</i> = 1 | 1260* | 4   | 68* | 69* | 2   | 116* | 43* | 30  | 10  |
| <i>n</i> = 1 | 1261* | 9   | 1   | 4   | 3   | 113* | 1   | 10  |     |
| <i>n</i> = 1 | 1262* | 10  | 67* | 4   | 1   | 46   | 4   | 79* |     |
| <i>n</i> = 1 | 1263* | 2   | 1   | 4   | 2   | 114* | 4   | 34  |     |

| N Isolate | ST | <i>arcC</i> | <i>ddl</i> | <i>gki</i> | <i>recP</i> | <i>tdk</i> | <i>tpi</i> | <i>yqiL</i> | CC |
|-----------|----|-------------|------------|------------|-------------|------------|------------|-------------|----|
|-----------|----|-------------|------------|------------|-------------|------------|------------|-------------|----|

|              |       |     |     |     |     |      |     |     |
|--------------|-------|-----|-----|-----|-----|------|-----|-----|
| <i>n</i> = 1 | 1264* | 40  | 10  | 69* | 36* | 115* | 44* | 80* |
| <i>n</i> = 1 | 1284* | 71  | 1   | 3   | 1   | 54   | 2   | 3   |
| <i>n</i> = 1 | 1285* | 81* | 30  | 30  | 1   | 115* | 47* | 38  |
| <i>n</i> = 1 | 1286* | 85* | 66* | 5   | 37* | 109* | 7   | 5   |
| <i>n</i> = 1 | 1287* | 81* | 68* | 4   | 36* | 118* | 43* | 15  |
| <i>n</i> = 1 | 1288* | 2   | 2   | 69* | 2   | 119* | 4   | 10  |

**Supplementary Table S2.** Distribution of Sequence Types (STs) within the three defined Clonal Complex (CC)

| N Isolate | ST   | CC  |
|-----------|------|-----|
| 1089      | 294  | 143 |
| 1107      | 384  | 143 |
| 1886      | 562  | 143 |
| 2210      | 562  | 143 |
| 2362      | 562  | 143 |
| 2457      | 808  | 143 |
| 2679      | 808  | 143 |
| 2717      | 808  | 143 |
| 2743      | 808  | 143 |
| 2864      | 1112 | 143 |
| 2900      | 1189 | 143 |
| 3021      | 1189 | 143 |
| 3024      | 1192 | 143 |
| 3027      | 1192 | 143 |
| 3046      | 1192 | 143 |
| 3152      | 1192 | 143 |
| 3213      | 1195 | 143 |
| 3257      | 350  | 86  |
| 3295      | 1175 | 86  |
| 3303      | 1175 | 86  |
| 3308      | 1185 | 86  |
| 3383      | 1200 | 86  |
| 3464      | 1197 | 5   |

**Supplementary Table S3.** Primer sequences for resistance genes and PCR conditions.

| Target Gene    | Nucleotide Sequence<br>(5'-3')                     | Annealing<br>Temperature (°C) | Amplicon Size<br>(bp) | Reference |
|----------------|----------------------------------------------------|-------------------------------|-----------------------|-----------|
| <i>aad-6</i>   | AGAAGATGTAATAATATAG<br>CTGTAATCACTGTTCCCGCCT       | 37                            | 978                   | [31]      |
| <i>aphA-3'</i> | GGGGTACCTTTAAATACTGTAG<br>TCTGGATCCTAAAACAATTCATCC | 50                            | 848                   | [32]      |
| <i>blaZ</i>    | AAGAGATTTGCCTATGCTTC<br>GCTTGACCACTTTTATCAGC       | 45                            | 517                   | [33]      |
| <i>ermA</i>    | AAGCGGTAAACCCCTCTGAG<br>TCAAAGCCTGTCGGAATTGG       | 58                            | 440                   | [34]      |
| <i>ermB</i>    | CATTTAACGACGAACTGGC<br>GGAACATCTGTGGTATGGCG        | 58                            | 424                   | [34]      |
| <i>ermC</i>    | ATCTTTGAAATCGGCTCAGG<br>CAAACCCGTATTCCACGATT       | 58                            | 294                   | [34]      |
| <i>ermTR</i>   | ATAGAAATTGGGTCAGGAAAAGG<br>CCCTGTTTACCCATTTATAAACG | 48                            | 376                   | [35]      |
| <i>mefA</i>    | AGTATCATTAATCACTAGTGC<br>TTCTTCTGGTACTAAAAGTGG     | 45                            | 500                   | [35]      |
| <i>tetO</i>    | AACTTAGGCATTCTGGCTCAC<br>TCCCACTGTTCCATATCGTCA     | 50                            | 515                   | [36]      |

|             |                                                |    |     |      |
|-------------|------------------------------------------------|----|-----|------|
| <i>tetL</i> | CATTTGGTCTTATTGGATCG<br>ATTACACTTCCGATTTCCG    | 54 | 456 | [37] |
| <i>tetM</i> | GTAAATAGTGTTCTTGGAG<br>CTAAGATATGGCTCTAACAA    | 52 | 576 | [37] |
| <i>tetK</i> | GTAGCGACAATAGGTAATAGT<br>GTAGTGACAATAAACCTCCTA | 55 | 360 | [36] |
| <i>tetS</i> | CATAGACAAGCCGTTGACC<br>ATGTTTTTGGAACGCCAGAG    | 48 | 667 | [38] |

---
